# Supplementary material for: Altercentric Intrusions from Multiple Perspectives: Beyond Dyads
Source: PubMed Central journal article supplement (PMC4250177; doi:10.1371/journal.pone.0114210), 2014-12-01
Supplement: pone.0114210.s002.pdf [file pone.0114210.s002.pdf]

|                          | Self perspective  |                   | Other(s) perspective |                   |
|--------------------------|-------------------|-------------------|----------------------|-------------------|
|                          | Consistent        | Inconsistent      | Consistent           | Inconsistent      |
| One_avatar_centered      | 662.37<br>± 34.37 | 692.88<br>± 32.62 | 599.75<br>± 30.21    | 688.40<br>± 36.65 |
| One_avatar_off-centered  | 689.17<br>± 37.2  | 731.91<br>± 37.39 | 638.28<br>± 30.92    | 726.02<br>± 37.93 |
| Two_avatars_centered     | 681.83<br>± 32.52 | 733.31<br>± 37.68 | 638.04<br>± 35.55    | 715.59<br>± 42.87 |
| Two_avatars_off-centered | 671.56<br>± 29.15 | 669.88<br>± 27.06 | 687.2<br>± 37.99     | 736.64<br>± 40.11 |

Table S1: Reaction times data (ms) (mean ± standard error)
