# Supplementary material for: Altercentric Intrusions from Multiple Perspectives: Beyond Dyads
Source: PLOS journal article supplement (doi:10.1371/journal.pone.0114210), 2014-12-01
Supplement: S1 (10.1371/journal.pone.0114210.s001) [file journal.pone.0114210.s001]

## Appendix S1: Full set of stimuli

The stimuli marked with (\*) correspond to consistent stimuli. In the one\_avatar\_centered, the one\_avatar\_off-centered, and the two\_avatars\_centered conditions consistent stimuli were repeated twice in order to balance the overall number of consistent and inconsistent trials.

The mirror image of each of the stimuli was also presented in the experiment (balanced across subjects).

Pictures adapted from [1].

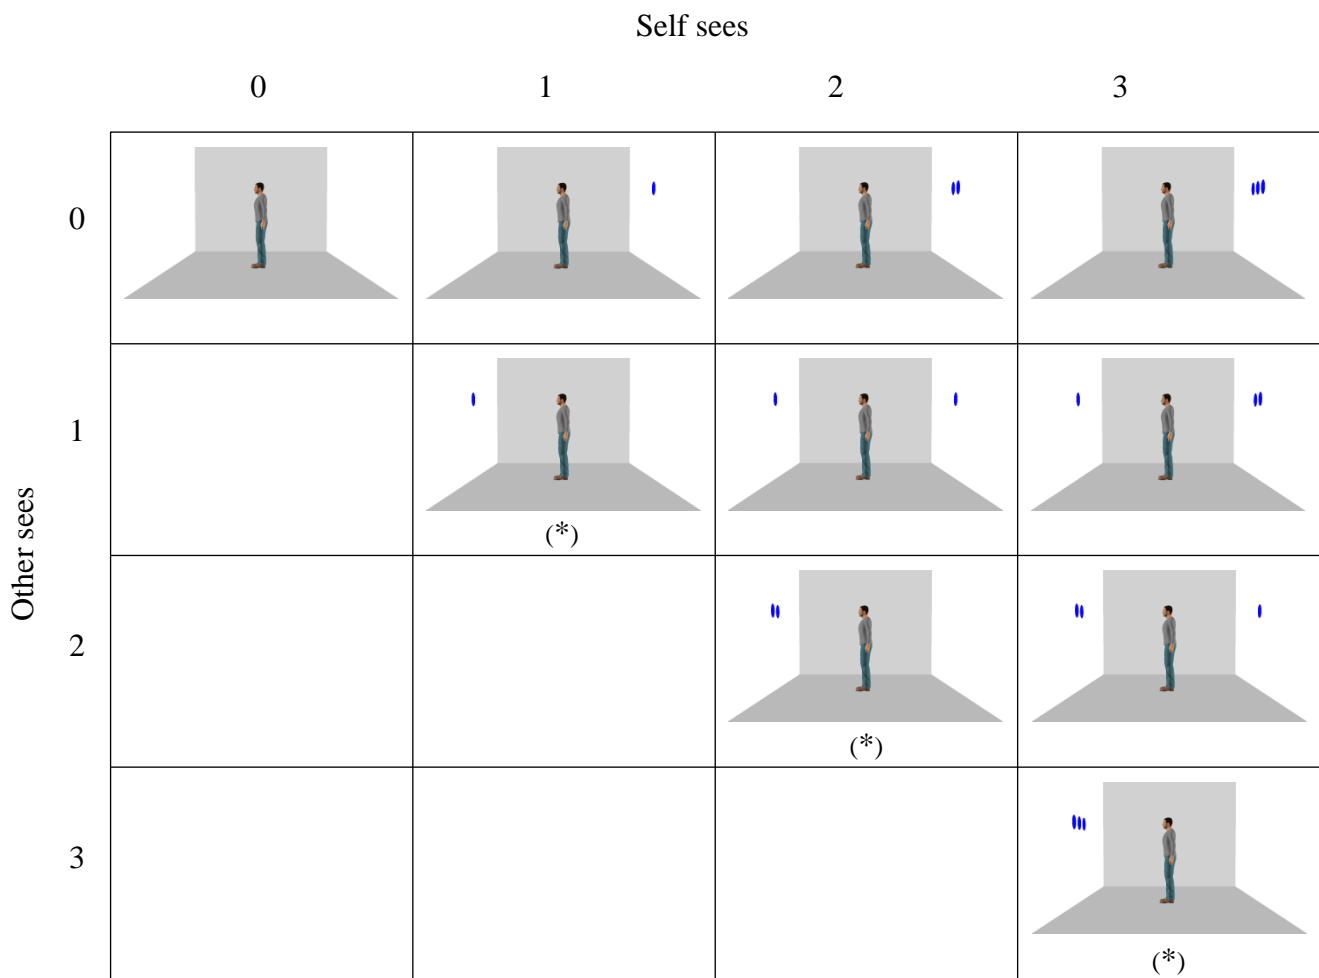

One\_avatar\_centered

Self sees

0

1

2

3

Other sees

0

1

2

3

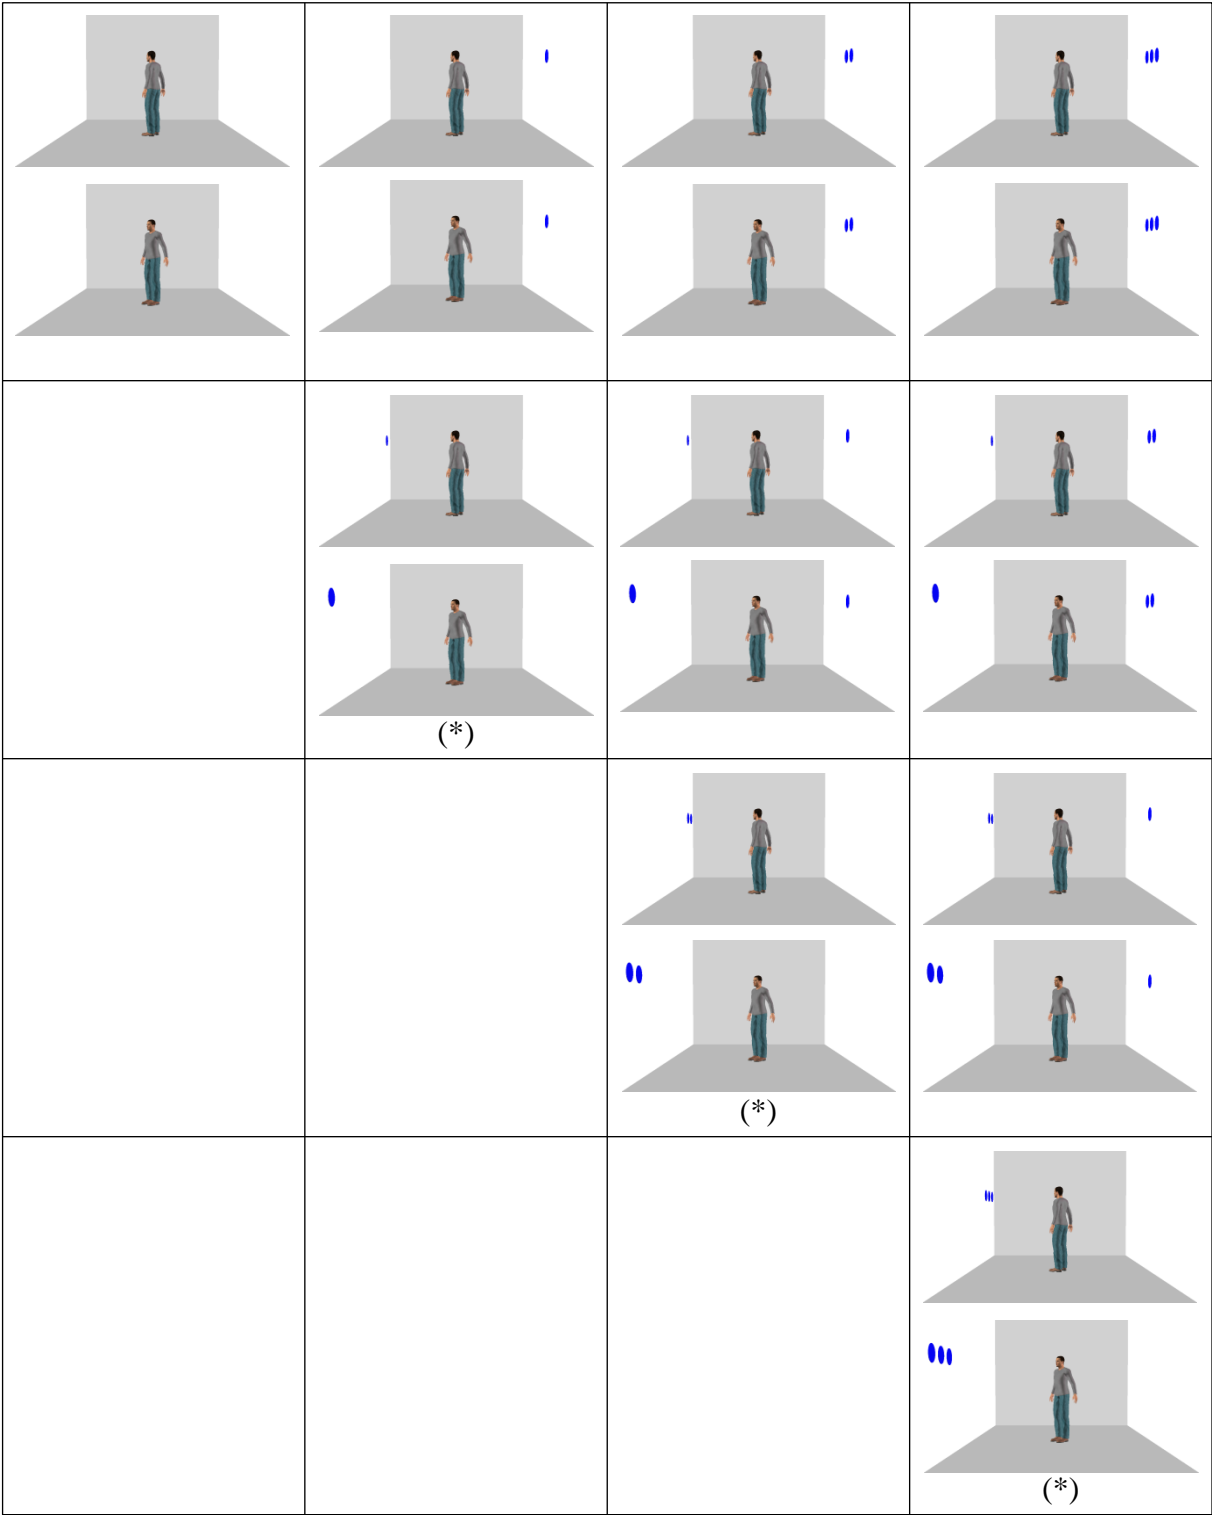

One\_avatar\_off-centered

|            |   | Self sees                                                                         |                                                                                          |                                                                                           |                                                                                             |
|------------|---|-----------------------------------------------------------------------------------|------------------------------------------------------------------------------------------|-------------------------------------------------------------------------------------------|---------------------------------------------------------------------------------------------|
|            |   | 0                                                                                 | 1                                                                                        | 2                                                                                         | 3                                                                                           |
| Others see | 0 | 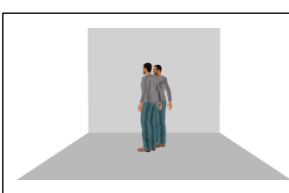 |         |         |          |
|            | 1 |                                                                                   | <br>(*) |         |          |
|            | 2 |                                                                                   |                                                                                          | <br>(*) |          |
|            | 3 |                                                                                   |                                                                                          |                                                                                           | <br>(*) |

Two\_avatars\_centered

Self sees

0

1

2

3

Others see

0

1

2

3

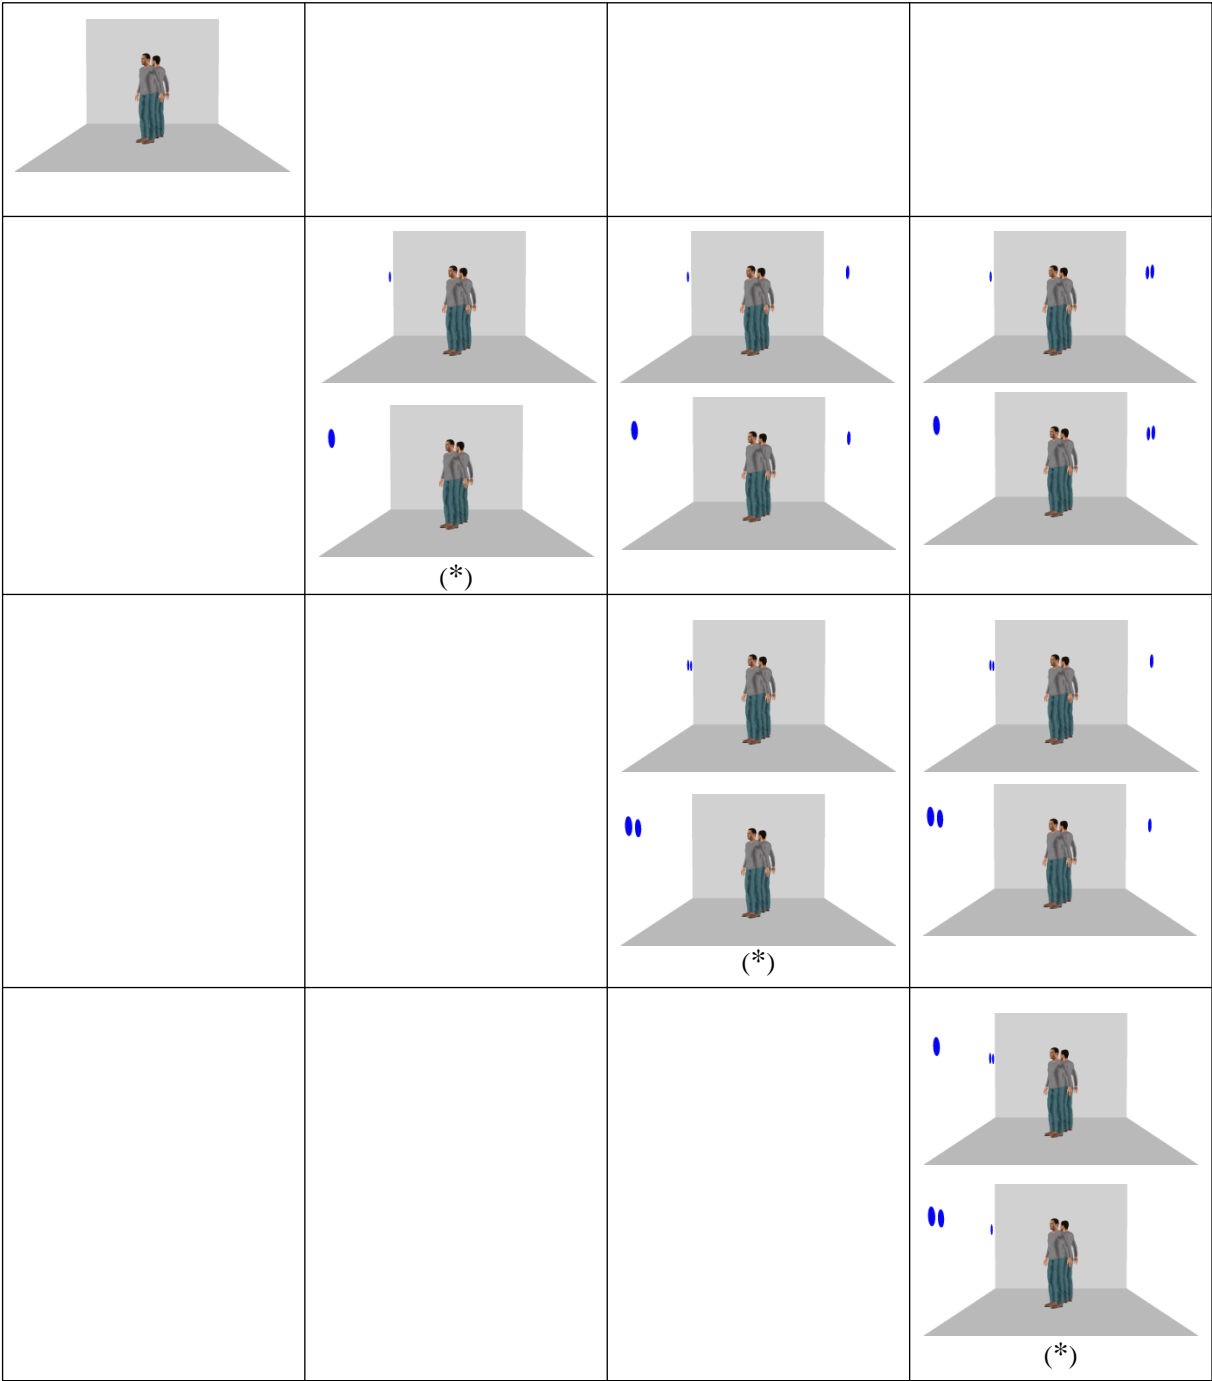

Two\_avatars\_off-centered
